# Supplementary material
Source: publisher figshare collection journal article supplement (https://gsajournals.figshare.com/ndownloader/files/13687616)
Supplement: Supplementary file 1 [file 13687616]

## Sheet: Translation inhibitors
Strains	Chloramphenicol-50mg/L,SE, 48h	Chloramphenicol-75mg/L,SE, 48h	Chloramphenicol-100mg/L, SE, 48h	Chloramphenicol-100mg/L,YPE, 24h	Chloramphenicol-100mg/L,YPE, 48h	Erythromycin-150mg/L, SE, 72h	Erythromycin-150mg/L, SE, 96h	Erythromycin-300mg/L, SE, 48h	Erythromycin-150mg/L, YPE, 96h	Spiramycin-250mg/L, SE, 72h	Spiramycin-250mg/L, SE, 96h	Spiramycin-500mg/L, SE, 48h	Spiramycin-500mg/L, YPE, 24h	Spiramycin-500mg/L, YPE, 48h	Paromomycin-100mg/L, YPE, 24h	Paromomycin-100mg/L, YPE, 48h	Hygromycin B-30mg/L, YPE, 48h	G418-15mg/L, YPE, 48h	Nourseothricin-4mg/L, YPE, 48h
s288c	1.01133		1.03382	0.894407	1.37838	0.6797	0.877	0.869929	0.0157391	0.531708	0.984481	1.01616	0.0227785	0.000156104	0.144287	0.671306	0.707404	0.795638	0.867274
sk1	1.03819	0.968048	0.955869	0.912472	1.69664	0.786232	0.87899	0.481463	0.395166	0.990312	1.05138	0.842566	0.94532	1.83555	0.49174	0.416981	0.402744	0.268439	0.0142404
rm11-1a	1.01665	1.01395	0.933368	0.93162	1.33982	0.979912	1.03976	0.933622	0.800787	1.01287	1.0207	0.924821	0.874182	1.11014	0.942773	0.890797	0.807659	0.828035	0.755559
sigma1278b	1.00679	1.02278	0.940713	0.941667	1.28636	1.06459	1.12277	0.993793	0.863314	1.05459	1.06751	0.980484	0.863455	1.0954	0.733335	0.747619	0.676721	0.354184	0.335391
yps163	1.00803	0.97007	0.958237	0.929259	1.26324	0.871137	0.898336	0.856822	0.540324	1.03855	1.05094	0.927586	0.710332	0.631623	0.898934	0.901447	0.662447	0.737018	0.541477
yjm789	0.879399	0.892859	0.857813	0.710717	0.981365	1.02103	1.05802	0.979206	0.833313	1.03279	1.03996	0.982884	0.870375	1.16968	0.884437	0.820083	0.746338	0.761698	0.573755
m22	1.03861	1.03798	0.971366	0.943132	1.23256	1.01721	1.06877	0.936762	0.664563	1.07902	1.11993	1.03321	0.674401	0.67805	0.892079	0.923228	0.884479	0.847826	0.645178
yjm189	0.969041	0.914029	1.02641	0.956439	1.45149	0.730731	0.836105	0.69772	0.0657539	0.882258	0.895954	0.877641	0.487554	0.76245	0.909694	0.908328	0.611255	0.549239	0.120243
yjm193	1.02683	1.0159	0.972298	0.936838	1.26715	0.964467	0.98036	0.924605	0.43275	1.01488	1.03285	0.969973	0.837975	1.15092	0.902352	0.893372	0.730241	0.646121	0.586475
yjm195	1.04789	1.02773	1.03916	0.906551	1.19388	1.04366	1.07258	0.94617	0.738745	1.04939	1.08179	0.914903	0.845002	1.16473	0.924829	0.899446	0.763403	0.729074	0.688245
yjm244	0.980363	0.929393	0.846154	0.910117	1.41504	0.729969	0.841133	0.465872	0.335435	0.988544	0.998427	0.593561	0.855384	1.23097	0.892235	0.8751	0.514396	0.521836	0.485889
yjm248	1.00224	1.01863	0.99001	0.915894	1.27024	0.932853	1.00049	0.670084	0.38093	1.01654	1.03081	0.0686137	0.302886	0.01669	0.102198	0.00240103	0.29725	0.0872268	0.00309695
yjm270	1.00381	0.935161	0.993157	0.956253	1.56303	1.14649	1.23641	1.04222	1.31065	1.02068	1.10363	0.862924	1.31787	1.80516	0.568686	0.573466	0.0232863	0.0263561	0.00779884
yjm271	0.974132	0.939154	0.81156	0.675143	1.27617	1.0039	1.04451	0.942042	0.639727	1.04618	1.061	0.987589	0.480487	1.07645	0.648577	0.737608	0.113132	0.151965	0.0158005
yjm320	0.8625	0.715825	0.524929	0.0106824	0.204971	0.959896	0.982274	1.01873	0.0512062	1.01207	1.01696	0.964636	0.436354	0.292642	0.404981	0.330653	0.605241	0.630835	0.288235
yjm326	1.03556	1.0303	1.0168	0.973208	1.38865	1.03673	1.06617	0.977978	0.430259	1.07602	1.08279	1.00794	0.49369	0.631675	0.909182	0.787403	0.73014	0.665032	0.387421
yjm428	0.911341	0.856228	0.37012	0.272474	0.501662	1.01016	1.09302	0.938069	0.941686	1.04056	1.06641	0.970747	0.985171	1.28795	0.926768	0.953287	0.897433	0.930306	0.769449
yjm450	0.300879	0.013171	0.636053	0	0.00651178	0.947165	0.99212	0.765192	0	1.04382	1.07589	0.80037	0.00122043	0.00143341	0.805462	0.777828	0.856822	0.877643	0.885182
yjm451	1.0042	0.966986	0.936057	0.839319	1.10543	0.917306	0.908637	0.864771	0.529833	1.02666	1.05509	1.00036	0.854186	1.02883	0.901959	0.821311	0.760879	0.867319	0.859136
yjm453	1.00637	1.03522	0.943776	0.962058	1.32038	1.03355	1.03096	0.960164	0.717657	1.01335	1.03179	0.958331	0.657722	1.0448	0.930283	0.868692	0.694819	0.692481	0.671473
yjm456	1.02964	1.00668	1.03198	0.975004	1.26142	1.05782	1.10164	0.957995	0.611637	1.05649	1.07654	0.972328	0.922377	0.931379	0.738084	0.692474	0.660178	0.696917	0.630593
yjm470	1.32601	1.73603	4.40819	1.48905	10.0765	1.00345	1.80905	1.90761	0.171549	1.03557	1.73414	2.1309	2.2099	24.5267	0.911576	0.629615	0.402285	1.13737	0.38398
yjm541	0.94818	0.845504	0.707345	0.476907	0.766036	0.956836	0.977469	0.949536	0.507639	0.971068	0.991529	0.957527	0.886606	1.18822	0.739096	0.613664	0.622011	0.617587	0.576268
yjm554	0.792883	0.668212	0.478913	0.00639596	0.502249	0.997028	1.01818	0.934137	0.437441	1.01484	1.01794	0.956745	0.619303	0.938309	0.733421	0.559603	0.648532	0.628171	0.561733
yjm555	0.999931	1.03395	0.984593	0.979127	1.3802	1.12149	1.14967	0.949448	0.621876	1.05215	1.08313	0.949415	0.685931	1.11001	0.93119	0.910048	0.628765	0.717576	0.691449
yjm627	1.0298	1.03539	0.980088	0.921079	1.25741	0.928086	0.971436	0.852263	0.396033	1.02025	1.06918	0.952437	0.508194	0.780375	0.916826	0.890379	0.764612	0.674426	0.669318
yjm681	0.948183	0.884373	0.625061	0.756253	1.3114	0.97794	1.0377	0.937737	0.864773	1.00633	1.07571	0.991902	0.987488	1.30682	0.894087	0.897406	0.372706	0.317377	0.259689
yjm682	1.03012	1.03841	0.994662	0.980346	1.23145	0.97373	1.02943	0.856751	0.568607	1.03797	1.05134	0.943892	0.949255	1.17582	0.95597	0.911645	0.79753	0.914057	0.82535
yjm683	0.809526	0.562849	0.461964	0.0268285	0.329935	0.872349	0.974446	0.71117	0.550034	1.02863	1.0547	0.821885	0.846818	0.943585	0.845851	0.7595	0.648433	0.444021	0.195141
yjm689	0.627306	0.345692	0.268758	0.00386933	0	0.864361	0.96264	0.730128	0.432385	0.993526	1.00813	1.01688	0.898684	1.37823	0.797748	0.839696	0.514964	0.594557	0.235601
yjm693	1.02476	1.03709	0.98715	0.898214	1.27039	0.969532	1.02113	0.776528	0.314448	1.00237	1.02463	0.825345	0.834743	0.951659	0.930164	0.909374	0.753347	0.679447	0.526407
yjm969	1.01798	1.01273	0.966792	0.96184	1.38301	0.934683	0.970023	0.892222	0.758159	0.99942	1.01057	0.75234	0.747066	0.742514	0.976333	0.992811	0.765794	0.709173	0.524515
yjm972	1.00209	0.984136	0.936876	0.873913	1.21206	0.913623	0.961361	0.777003	0.689279	1.00048	1.02529	0.819623	0.807318	0.89536	0.986626	0.991155	0.567198	0.636729	0.234419
yjm975	1.00341	0.981017	0.936618	0.919288	1.38442	0.905692	0.967178	0.82665	0.730226	0.978707	0.981775	0.737621	0.487368	0.471386	0.954052	0.952824	0.835805	0.677291	0.700978
yjm978	1.05168	1.01696	1.04137	0.966035	1.37622	0.974409	1.00595	0.905084	0.695169	1.01347	1.01865	0.72462	0.672364	0.70027	0.919669	0.922498	0.66517	0.6609	0.576332
yjm981	0.980382	1.00656	0.931636	0.938405	1.38073	0.907351	0.955721	0.851576	0.701367	1.01116	1.01439	0.52788	0.660646	0.74482	0.998189	1.01817	0.668427	0.677396	0.547929
yjm984	1.037	1.00375	0.985091	0.945044	1.30527	0.92476	0.954478	0.842459	0.747753	1.02746	1.04167	0.847673	0.804237	0.850428	0.918883	0.948555	0.651323	0.779204	0.464313
yjm987	0.992413	0.983631	0.953469	0.947152	1.23784	0.941665	0.979786	0.825957	0.673008	1.01972	1.04995	0.831178	0.770725	0.84099	0.832175	0.761218	0.419258	0.640261	0.339026
yjm990	1.05635	1.06874	0.952487	0.961599	1.36152	0.970891	1.04328	0.810799	0.787109	0.998525	1.06436	0.83672	0.857183	1.00188	0.95382	0.919454	0.727789	0.773801	0.660746
yjm993	1.01899	1.01136	0.924523	0.976145	1.34546	0.932326	0.977824	0.83334	0.760208	0.99925	1.02083	0.879641	0.859182	0.915374	0.99019	0.987595	0.861188	0.830841	0.731648
yjm996	1.02999	1.01496	0.97701	0.905414	1.28971	0.905514	0.995859	0.689112	0.725562	1.02262	1.04326	0.832887	0.768134	0.831083	0.947856	0.969803	0.764298	0.755463	0.648822
yjm1078	1.04116	1.03819	1.02527	0.959799	1.27552	0.871003	0.923838	0.835516	0.695638	0.995527	1.00988	0.965804	0.79861	0.857245	0.719213	0.688069	0.669219	0.652145	0.412371
yjm1083	0.685818	0.263539	0.418195	0.00251645	0	0.945582	1.01108	0.874814	0.00345752	1.06221	1.06732	1.03404	0.247248	0.34623	0.393179	0.635593	0.10045	0.0270765	0.0867757
yjm1129	0.974324	0.95114	0.91389	0.914772	1.2511	0.951805	0.990003	0.892458	0.796121	0.993111	1.00174	0.746423	0.856454	1.12913	0.94195	0.902135	0.807564	0.722908	0.758351
yjm1133	0.819631	0.712165	0.68195	0.0270267	0.504493	1.06519	1.10834	0.913248	0.725386	1.12667	1.14667	1.00364	0.785751	1.05462	0.930802	0.88923	0.845444	0.794036	0.705246
yjm1190	0.984748	0.950606	0.77913	0.414113	0.771347	0.911933	0.948597	0.854751	0.502402	0.983079	0.984303	0.829233	0.537711	0.576137	0.642682	0.488587	0.374827	0.290364	0.283554
yjm1199	0.799933	0.569782	0.125986	0.00059298	0	0.714468	0.822764	0.54047	0.00802129	0.800854	0.84747	0.149516	0.000854743	0	0.148603	0.351981	0.514338	0.151788	0.00219095
yjm1202	0.975226	0.898062	0.931592	0.931206	1.2977	0.854778	0.916555	0.789085	0.00189492	1.01147	1.03826	0.855275	0.0606933	0.00783421	0.888077	0.837592	0.67666	0.535457	0.573731
yjm1208	0.965229	0.961364	0.948823	0.901097	1.26391	1.01709	1.01866	0.910182	0.432281	0.883937	0.927973	0.0429462	0.000278811	0	0.694116	0.866258	0.713258	0.762959	0.733428
yjm1242	NA	NA	0.505918	0	1.875	0.00229969	0.511772	0.287446	0	0.398479	0.760765	0.00464973	0.0172414	3.625	0	0.714667	0.693382	0	0.000179598
yjm1244	0.982003	1.03487	0.886128	0.960547	1.46948	0.90017	0.947174	0.699829	0.591098	1.00714	1.04674	0.652497	0.85457	1.33415	0.83366	0.660322	0.345634	0.357084	0.344058
yjm1248	1.00883	1.02912	0.99069	0.901434	1.22362	0.763394	0.825914	0.587192	0.0381729	0.988144	1.02843	0.663626	0.109954	0.0829784	0.641158	0.698647	0.830324	0.684317	0.752773
yjm1252	1.0506	1.09565	1.04505	0.980438	1.22398	1.21616	1.24977	0.995288	0.399496	0.994802	1.03389	0.610612	0.218201	0.0133013	0.728345	0.753255	0.873731	0.718348	0.540567
yjm1273	1.02667	1.01028	0.912721	0.921718	1.24709	0.924404	0.94717	0.837774	0.576599	1.01049	1.09024	0.893387	0.732294	0.679165	0.902065	0.847841	0.619583	0.812346	0.523419
yjm1304	0.904165	0.816448	0.596712	0.058866	0.741353	0.825235	0.917952	0.894368	0.549755	1.05824	0.99193	0.876217	0.828263	1.15558	0.792044	0.776423	0.63308	0.556116	0.552891
yjm1307	0.900409	0.855585	0.640618	0.110668	0.927725	0.391875	0.689142	0.35487	0.00063643	0.974332	0.919122	0.686713	0.0010454	0	0.741371	0.774578	0.705049	0.707176	0.496859
yjm1311	1.04379	1.02877	0.94875	0.893483	1.13504	1.11903	1.1625	1.01311	0.817475	0.850447	1.08014	0.993365	0.747363	0.772539	0.892893	0.926952	0.707328	0.69705	0.470904
yjm1326	0.869953	0.830718	0.642285	0.1705	0.674908	0.871253	0.897619	0.672407	0.237738	1.07408	0.992747	0.477732	0.79061	0.819077	0.924359	0.83004	0.640469	0.646361	0.486049
yjm1332	1.02985	1.03358	0.914129	0.966219	1.31438	0.925359	1.02709	0.7539	0.739055	0.968775	1.02821	0.928691	0.94678	1.36564	0.909934	0.885084	0.724527	0.821537	0.789667
yjm1336	1.00097	1.02402	1.00444	0.939932	1.32197	0.858443	0.897822	0.910443	0.000298043	1.01024	0.98839	0.921075	0.000742708	0.00818472	0.99602	1.03111	0.837313	0.735822	0.706555
yjm1338	1.01074	1.01808	0.980478	0.954046	1.30049	1.00567	1.02306	0.941981	0.449594	0.947987	1.08337	1.01351	0.657775	1.03908	0.919695	0.881697	0.676465	0.677859	0.618738
yjm1341	1.0314	1.05362	0.954936	1.00739	1.52221	1.04743	1.0632	0.851382	0.0187012	1.06127	1.06023	0.648553	0.000205761	0	0.462574	0.853941	0.850453	0.467084	0.28285
yjm1342	0.96728	0.966139	0.912718	0.833118	1.09989	0.94989	0.985187	0.809637	0.147196	1.01049	1.09249	0.970327	0.53979	0.462213	0.725942	0.704455	0.56951	0.611043	0.537119
yjm1355	1.01463	0.985053	0.888285	0.814932	1.15671	0.761085	0.936795	0.189977	0.331818	1.06522	1.06328	0.656648	0.863589	1.08741	0.817532	0.700348	0.0206578	0.224052	0.0407994
yjm1356	1.01006	1.04097	0.949476	0.828274	1.31283	0.741646	0.803411	0.396965	0.0027188	1.01387	0.908553	0.00444027	0.000829628	0.00539436	0.258212	0.53012	0	0.000243072	0.000261511
yjm1381	0.903391	0.95563	0.998005	0.897616	1.53233	0.612006	0.774996	0.78954	0.457484	0.901211	0.907351	0.893993	0.853153	1.26295	0.622771	0.00336666	0	0.00055657	0.0111981
yjm1383	0.050641	0.176751	0.675171	NA	NA	0.164304	0.793199	0.127028	NA	0.723183	0.952213	0.156054	Inf	NA	0.161932	0.948909	0.646056	0.869963	0.426785
yjm1385	0.932884	0.937295	0.85682	0.193048	0.185334	0.881966	0.99463	0.737302	0.339421	0.926286	1.06753	0.829254	0.375577	0.25887	0.909657	0.768268	0.481961	0.354996	0.346753
yjm1386	0.991605	1.00128	0.983673	0.939324	1.35359	0.860618	0.958012	0.595499	0.372006	1.06012	1.02146	0.693292	0.505329	0.600344	0.517033	0.643056	0.674838	0.568829	0.268999
yjm1387	0.930908	0.986246	0.921355	1.29349	2.83119	0.768972	0.843043	0.3105	0.0123737	1.00699	1.01613	0.545957	0.124259	0.138728	0.0698721	0.169707	0	0.000242743	0
yjm1389	1.05801	1.04283	1.0716	0.899107	1.22208	0.94319	0.9927	1.04361	0.75325	0.982186	1.00098	1.02897	0.759232	0.773747	0.882519	0.862063	0.746631	0.854963	0.703812
yjm1399	0.9866	0.986636	0.949062	0.98093	1.22903	0.840117	0.887742	0.868998	0.396668	0.926914	1.08043	0.952331	0.769133	0.680241	0.952204	0.874021	0.619239	0.68038	0.389332
yjm1400	1.01633	1.02162	0.934572	0.920561	1.27828	0.831799	0.917277	0.730159	0.41524	0.992147	1.05697	0.629174	0.515651	0.292407	0.922928	0.893937	0.595212	0.607495	0.452414
yjm1401	1.02625	1.01115	0.996015	0.762928	1.5135	0.944425	0.926477	0.954398	0.286524	1.04943	1.0129	1.09325	0.688613	1.1257	0.768667	0.878576	0.339576	0.284438	0.265273
yjm1402	0.97932	0.972039	0.906276	0.962729	1.3079	0.990401	1.00107	0.904446	0.55908	1.02094	1.09362	0.976982	0.784828	0.757819	0.938122	0.902275	0.706886	0.736721	0.607891
yjm1415	0.990993	1.01667	0.917499	0.969458	1.37642	0.608897	0.73118	0.424811	0.45467	1.00851	0.676694	0.198211	0.781314	1.11857	0.993946	0.97428	1.0045	0.970702	1.07527
yjm1417	1.02583	1.03141	0.964658	0.965486	1.34187	0.95598	1.00685	0.840696	0.895905	1.05493	1.00223	0.900151	0.771888	0.892284	0.866289	0.832081	0.584384	0.578076	0.463435
yjm1418	0.984872	1.00368	0.950723	0.961179	1.22854	0.907468	0.919062	0.793834	0.662139	0.476652	1.01472	0.914674	0.835809	0.823243	0.906376	0.845835	0.714233	0.628899	0.624174
yjm1434	1.01412	0.98912	0.919625	0.992285	1.33715	0.873622	0.885452	0.86518	0.666968	0.985344	1.04975	0.919299	0.782596	0.728658	0.899246	0.830389	0.636925	0.730434	0.553061
yjm1439	0.973601	0.992275	0.968068	0.883212	1.26986	0.882383	0.944891	0.0229883	0	0.988694	1.10221	0.681632	0	0	0.0782765	0.0338433	0.511038	0.478521	0.155469
yjm1443	1.02872	1.0541	1.0139	0.966999	1.33436	1.13332	1.20885	1.09324	0.527093	0.868609	1.08165	1.01679	0.755941	0.728156	0.950362	0.964442	0.703146	0.721239	0.540377
yjm1444	0.953785	1.01018	0.935936	0.961904	1.29367	0.951528	1.12074	0.855016	0.000718713	0.871459	1.24759	0.901558	0.0496883	0.0369729	0.0305002	0.613391	0.7658	0.947982	0.351539
yjm1447	0.944796	0.891645	0.835832	0.88315	1.25307	0.761263	0.850946	0.665246	0.0223455	1.00711	1.03607	0.880589	0.414495	0.41224	0.881474	0.930699	0.622338	0.437356	0.393373
yjm1450	0.999994	1.00017	0.983433	0.929868	1.30079	0.95908	1.00328	0.937667	0.712133	1.05283	1.03145	0.905824	0.814004	0.891503	0.96217	1.05536	0.777842	0.936908	0.693676
yjm1460	1.05468	1.05476	0.986612	0.918108	1.31066	0.89774	0.929208	0.892833	0.728219	1.06173	1.0357	1.01329	0.802902	0.877396	0.915016	0.936889	0.678926	0.852229	0.532315
yjm1463	1.00982	1.00405	0.929808	0.952122	1.35685	0.992622	0.993522	0.932009	0.453241	1.25882	1.03528	0.94386	0.509953	0.806951	0.928889	0.890253	0.935233	0.98625	1.06515
yjm1477	0.999719	0.986481	0.956765	0.944179	1.33087	0.683731	0.766537	0.640289	0.80621	1.03012	0.930845	0.849485	0.906643	1.35957	0.91867	0.920867	0.732263	0.543111	0.58716
yjm1478	1.03599	1.03284	0.90298	0.918751	1.29919	0.96523	1.01179	0.895215	1.22074	1.02091	1.01659	0.892547	1.04453	1.63133	0.907527	0.933467	0.697578	0.406015	0.305026
yjm1479	0.981034	0.945085	0.90778	0.824547	1.15506	0.913758	1.02165	0.831567	0.373895	1.00276	1.06916	0.786154	0.397117	0.0670263	0.911258	0.906448	0.662421	0.269417	0.104026
yjm1526	0.981503	1.04424	1.03764	0.923555	1.27048	0.921173	0.942417	0.733087	0.684674	1.00535	0.998974	0.710883	0.815897	1.08829	0.958704	0.922618	0.810492	0.701415	0.708138
yjm1527	1.00471	0.991622	0.986437	0.960652	1.32987	1.02198	1.10362	0.940158	0.550307	0.930691	1.09908	0.983778	0.861623	1.08876	0.934386	0.937922	0.743517	0.870152	0.673677
yjm1549	1.01755	1.01469	0.9568	0.985596	1.2929	0.856227	0.914171	0.787084	0.882935	0.975192	1.00785	0.864475	0.8889	1.12467	0.867863	0.755034	0.225472	0.452309	0.245398
yjm1573	0.992632	0.952931	0.893971	0.96061	1.3145	0.908371	0.933923	0.836966	0.582222	1.04315	1.07254	0.945073	0.780432	0.749024	0.923225	0.898247	0.684972	0.731175	0.628829
yjm1574	1.08841	1.12939	1.07721	1.05754	1.32797	0.988671	1.03849	0.792687	0.503244	0.983304	1.09956	1.01417	0.991363	1.17233	0.837644	0.849186	0.849359	0.838727	0.359123
yjm1592	1.06492	1.10339	1.01267	0.929361	1.20797	1.01288	1.06169	1.0686	0.886521	1.04571	1.03224	1.1045	0.814881	0.876263	0.922274	0.874228	0.842266	0.887959	0.703898
yjm1628	1.08468	1.02785	1.01996	0.935129	1.25888	0.897337	0.95028	0.767517	0.385737	0.957639	0.893919	0.649197	0.34573	0.243839	0.819916	0.938651	0.718699	0.905937	0.798322
yjm1846	1.00953	1.00181	0.938149	0.971315	1.37758	0.768458	0.918518	0.675888	0.941354	1.06193	0.96781	0.932445	0.386252	0.857448	0.785133	0.709903	0.516857	0.829533	0.0338245
yjm1847	0.97318	0.914271	0.792953	0.636466	2.47627	0.922527	0.999122	0.727994	0	1.06275	0.892316	0.0663801	0	0	0	0.00013488	0	0.00192643	0.000120424
yJM1869	0.982098	0.963792	0.922708	0.970238	1.20829	0.853442	0.913243	0.725079	0.377512	0.988708	0.905929	0.536383	0.738183	1.02491	0.937803	0.865337	0.397274	0.717815	0.563933
yjm1870	1.01387	1.00285	0.994006	0.953835	1.32728	0.983144	1.01183	0.856723	0.981881	0.872095	1.0204	0.983449	0.957771	1.32234	0.93547	0.968771	0.554956	0.542496	0.302263

## Sheet: COB inhibitors
Strains	AntimycinA-0.001mg/L, SE, 48h	AntimycinA-0.005mg/L, SE, 48h	AntimycinA-0.001mg/L, YPE, 24h	AntimycinA-0.001mg/L, YPE, 48h	Myxothiazol-0.2mg/L, SE, 48h	Myxothiazol-0.1mg/L, YPE, 24h	Myxothiazol-0.1mg/L, YPE, 24h
s288c	1.00257	0.000410692	0.809129	0.968414	0.00130227	0.743021	1.32746
sk1	1.03557	0.872706	0.978125	1.044	0.489723	0.922189	1.57147
rm11-1a	1.00572	0.297756	0.927581	0.961887	0.178408	0.934374	1.32297
sigma1278b	1.01463	0.00520907	0.949289	0.977157	0.0297083	0.967295	1.27828
yps163	1.05769	0.0157654	0.939173	0.967928	0.000146714	0.95477	1.2864
yjm789	0.96914	0.0702336	0.989347	1.01825	0.131152	0.906354	1.21227
m22	1.06168	0.00814187	0.963667	0.994601	0.109334	0.951238	1.26111
yjm189	0.826068	0	0.860055	0.935723	0	0.924358	1.37489
yjm193	1.03486	0.0500458	0.988094	0.970935	0.00160476	0.953005	1.25635
yjm195	0.980326	0.00411897	0.923816	0.902323	0.372835	0.905197	1.17237
yjm244	0.360191	0.170097	0.875099	0.982789	0	0.913919	1.35574
yjm248	0.905048	0.00712023	0.918226	0.96244	0	0.922164	1.24841
yjm270	0.934684	0.0273253	0.886973	1.0408	0.69534	0.884179	1.58705
yjm271	0.545114	0.0889041	0.86589	0.953982	0	0.836131	1.31848
yjm320	1.0389	0.000503713	0.930667	0.951721	0	0.575739	1.14397
yjm326	1.01878	0.256262	0.923116	0.960346	1.60356	0.969632	1.33189
yjm428	0.990269	0.0527683	0.919465	0.986028	0.00804982	0.520167	1.00552
yjm450	0.847716	0	0.529864	0.854856	0.0937065	0.664765	1.66922
yjm451	1.03744	0.000316263	0.98508	0.970768	0.141356	0.974774	1.29431
yjm453	1.04315	0.00785772	0.813469	0.859343	0.359122	0.88294	1.23548
yjm456	1.04513	0.00849226	0.957874	0.929144	0.0559142	0.931707	1.21831
yjm470	1.86095	0.0133705	0.24222	0.162174	1.79453	0.686291	4.30371
yjm541	1.05537	0.00103505	0.937039	0.931142	0.186077	0.884307	1.22818
yjm554	0.853228	0.0214771	0.947725	0.987475	0	0.88393	1.2592
yjm555	1.02297	0.00826035	1.00178	0.975335	1.37897	0.954199	1.32044
yjm627	1.11429	0.168149	0.972072	0.968172	0.00413391	0.928132	1.26162
yjm681	1.06205	0.140614	1.00073	0.971894	0.000129904	0.945932	1.27182
yjm682	1.01248	0.178476	0.966523	0.966828	0.991169	0.962929	1.19849
yjm683	1.02566	0.114216	0.994907	0.969359	0.0790662	0.906232	1.31704
yjm689	0.980771	0.000750018	0.192483	0.852707	0	0	0
yjm693	1.03166	0.175034	0.920461	0.97531	0.807552	0.902253	1.25095
yjm969	1.00261	0.194708	0.923827	0.991905	0.0460089	0.930343	1.31685
yjm972	1.02481	0.0027271	0.869923	0.903606	0.000429516	0.905431	1.23438
yjm975	0.941279	0.139109	0.89425	0.997209	0.0159832	0.909955	1.35573
yjm978	1.02209	0.0212627	0.916604	0.980677	0.000672766	0.969069	1.35901
yjm981	1.01844	0.0118541	0.855762	0.928892	0.0952578	0.917248	1.34518
yjm984	1.03032	0.00435757	0.928276	0.994509	0	0.958467	1.30442
yjm987	1.05327	0	0.978197	0.959689	0.00978318	0.962748	1.28322
yjm990	1.07609	0.111931	0.996774	0.967908	0.0484893	0.959163	1.38987
yjm993	1.03054	0.00416655	0.898139	0.948064	0.000634719	0.935823	1.28448
yjm996	1.05245	0.0536679	0.916123	0.978397	0	0.936574	1.31484
yjm1078	1.02913	0.219111	0.97809	1.0301	0.104622	0.979807	1.26536
yjm1083	0	0	0.0934534	0.657655	0	0	0
yjm1129	0.992349	0.0961632	0.887572	0.937669	0.000385666	0.89736	1.22579
yjm1133	1.03692	0.0447858	0.971126	0.961364	0.121039	0.909736	1.1714
yjm1190	1.02193	0.878657	0.879168	0.94566	0.0152535	0.762838	1.55583
yjm1199	0.992241	0.0035281	0.748758	0.861393	0	0.544175	1.85951
yjm1202	0.919592	0.000511702	0.92829	1.00176	0.0633661	0.915614	1.29009
yjm1208	0.547891	0.000343386	0.856028	0.958982	0.0651554	0.899382	1.24828
yjm1242	NA	NA	0	0	0	0	0
yjm1244	0.888412	0.13386	0.912479	0.860413	0.0450217	0.947589	1.74893
yjm1248	1.04421	1.09769	0.963736	0.994917	0.00659239	0.91547	1.23843
yjm1252	1.0467	0.0159661	0.964628	0.953875	0.102057	0.947289	1.20561
yjm1273	1.13039	0.0467169	0.974807	0.969594	0.0322782	0.961915	1.3033
yjm1304	0.993584	0.103265	0.944433	1.01851	0.00080298	0.882762	1.26575
yjm1307	0.887524	0.0262238	0.59677	0.854192	0	0.612836	1.28843
yjm1311	1.0124	0.181269	0.961034	0.998748	0.0042688	0.967754	1.18483
yjm1326	1.06356	0.00717249	0.87829	0.883547	0.0287523	0.821771	1.15895
yjm1332	1.03837	0.144354	0.930327	0.967827	0.000300727	0.97607	1.32022
yjm1336	0.960785	0.00736757	0.921882	0.918903	0.0231188	0.912043	1.31242
yjm1338	1.02875	0.00556948	0.665762	0.774302	0.0721012	0.928637	1.30301
yjm1341	0.612561	0.000191644	0.868563	0.968943	0.324901	0.907594	1.47196
yjm1342	1.02234	0.00807829	0.911835	0.936863	0.0594649	0.907915	1.24784
yjm1355	0	0.0733181	0.383011	0.72182	0.0453059	0.38411	1.01547
yjm1356	0.705265	0.00042097	0.695305	0.885046	0.117202	0.94241	1.36663
yjm1381	0.995184	0.000844776	0.935908	1.04339	0.0376625	0.878767	1.79889
yjm1383	0	0.209514	NA	NA	0.000710079	NA	NA
yjm1385	1.06639	0.00151487	0.923957	0.797157	0	0.572069	1.12495
yjm1386	0.993879	0.00111111	0.896752	0.961966	0.0179378	0.926087	1.30708
yjm1387	0	0	1.11652	0.952606	0	0.880266	2.6796
yjm1389	1.08136	0.143898	0.897276	0.969994	0.274933	0.864092	1.16719
yjm1399	1.0757	0.208245	0.999743	0.972859	0.030955	0.966652	1.2321
yjm1400	1.09565	1.1705	0.990928	0.972953	0.0421871	0.956087	1.33691
yjm1401	1.01477	0.00543801	0.998329	1.09384	0.00507144	0.890146	1.53184
yjm1402	1.03659	0.0827088	1.00784	0.991162	0.0509143	0.97261	1.34006
yjm1415	0	0.163502	0.971798	0.939412	0.0195348	0.897089	1.31009
yjm1417	1.02211	0.0775437	0.956733	1.0006	0.0442754	0.960113	1.32095
yjm1418	1.05849	0.403295	0.992516	0.958437	0.158685	0.948128	1.27467
yjm1434	1.08443	0.10391	1.04059	1.00041	0.385795	0.993187	1.38027
yjm1439	1.07807	1.07429	0.817467	0.864427	0.583113	0.902433	1.30763
yjm1443	1.06586	0.9132	0.955621	0.990175	0.00809147	0.95708	1.31709
yjm1444	1.05249	0.000826788	0.857062	0.90498	0	0.967707	1.26689
yjm1447	1.00236	0.143256	0.935904	1.12018	0	0.89215	1.22134
yjm1450	1.03606	0.00321169	0.915239	0.988246	0	0.925853	1.2657
yjm1460	1.08091	0.00395902	0.908283	0.990966	0.00272793	0.891509	1.22776
yjm1463	0.423235	0.0399462	0.978618	0.976243	0.0234567	0.951661	1.35439
yjm1477	0.921315	0.00344931	0.899978	0.990684	0.00150195	0.93813	1.27477
yjm1478	1.05319	0.234588	0.962326	0.943958	0.921695	0.935822	1.33218
yjm1479	1.00935	0.63123	0.94057	0.98057	0	0.897616	1.25282
yjm1526	0.877781	0.105845	0.962972	0.946717	0.0447012	0.846371	1.20099
yjm1527	1.00406	0.00189399	0.986059	0.967585	0.00523922	0.901231	1.27019
yjm1549	1.04858	0.00739771	0.971901	0.970618	0.833648	0.948915	1.23473
yjm1573	1.02742	0.471159	0.95281	0.994302	0.00252659	0.988437	1.33923
yjm1574	1.10608	0.127074	1.0058	0.979049	0.965008	1.01192	1.28239
yjm1592	1.08019	0.451127	1.01832	0.994352	0.706338	0.981509	1.32291
yjm1628	1.02213	0	0.895604	0.952749	0.054866	0.917752	1.19443
yjm1846	0.29417	0.002637	0.923336	0.936548	0.104896	0.906551	1.36078
yjm1847	0.993355	0	0.52438	0.966941	0.000872833	0.400038	2.34362
yJM1869	0.998482	0.000577439	0.905359	0.907774	0.465708	0.920465	1.18503
yjm1870	1.01561	0.0997767	0.977374	0.95763	0.0875416	0.932073	1.31428

## Sheet: ATP synthase inhibitor
Strains	Oligomycin-0.5mg/L, SE, 72h	Oligomycin-0.5mg/L, SE, 96h	Oligomycin-1mg/L, YPE, 24h	Oligomycin-1mg/L, YPE, 24h
s288c	1.24495	1.45968	0.97798	1.6139
sk1	1.05832	1.25226	0.27599	0.495793
rm11-1a	1.22587	1.43518	0.989927	1.48409
sigma1278b	1.07215	1.25409	0.443169	0.589585
yps163	0.297798	0.678104	0.128413	0.449701
yjm789	0.573425	0.753964	0.865552	0.985664
m22	0.851263	1.07948	0.471318	0.614883
yjm189	0	0.00307167	0.00447261	0
yjm193	0	0	0.000490695	0
yjm195	1.31037	1.44432	1.05761	1.48326
yjm244	0	0	0.00220153	0
yjm248	0	0.00288593	0.0198629	0.000962227
yjm270	1.34403	1.48657	0.00121509	0.0846398
yjm271	0	0	0.00396431	0
yjm320	0.747073	0.936695	0.139903	0.0856984
yjm326	1.31785	1.44685	0.864388	1.25154
yjm428	0	0.00174197	0.0319071	0
yjm450	0.0206799	0.0804929	0.000189322	0
yjm451	0.356393	0.688176	0.26468	0.252761
yjm453	0.462721	0.82897	0.110703	0.0603121
yjm456	0.489291	0.704573	0.489221	0.553671
yjm470	2.83798	5.03974	2.18146	17.3728
yjm541	0.533529	0.85918	0.107703	0.381238
yjm554	0.00968012	0.114472	0.0103243	0.0029035
yjm555	0.912935	1.12322	0.316845	0.796152
yjm627	0.950927	1.09716	0.00375545	0.00030581
yjm681	0.842682	0.937185	0.126244	0.10052
yjm682	0.131752	0.316585	0.308	0.00969963
yjm683	0.708536	0.949107	0.365701	0.630646
yjm689	0	0	0.00812839	0
yjm693	0.745345	1.05409	0.0879448	0.0260178
yjm969	0.87851	1.06458	0.805247	1.06476
yjm972	0.442017	0.823494	0.723728	0.947143
yjm975	0.692535	0.908061	0.829727	1.31155
yjm978	0.627321	0.927193	0.726271	0.898324
yjm981	0.712036	0.885755	0.640013	0.80109
yjm984	0.63851	0.913381	0.771701	0.969279
yjm987	0.472061	0.882372	0.772806	1.04472
yjm990	0.539146	0.950557	0.808791	1.12475
yjm993	0.677457	0.882911	0.837004	1.0415
yjm996	0.100946	0.745234	0.722374	0.875699
yjm1078	0.0585452	0.284325	0.0309541	0.00121039
yjm1083	0	0	0.00577668	0
yjm1129	0.883798	0.970333	0.997311	1.42654
yjm1133	0.39714	0.844961	0.228639	0.361859
yjm1190	0.750764	0.974192	0.494462	0.525734
yjm1199	0	0.00167403	0.00777314	0
yjm1202	0.0320915	0.388555	0.00702184	0.00282766
yjm1208	0.0838507	0.660485	0.000547521	0
yjm1242	0	0	0.387912	0
yjm1244	0	0	0.000590696	0
yjm1248	1.03093	1.25721	0.00885933	0.700306
yjm1252	0.866616	1.09745	0.0208201	0.0140909
yjm1273	0.175166	0.554614	0.242624	0.489798
yjm1304	0.654991	0.835782	0.220084	0.728421
yjm1307	1.01923	1.12926	1.01574	1.3801
yjm1311	0.725603	0.953139	0.0262861	0.00335492
yjm1326	0	0.010886	0.00165446	0
yjm1332	0	0.000755706	0.133809	0.00305076
yjm1336	0	0.00355494	0.00086473	0
yjm1338	0.193013	0.598506	0.00177456	0
yjm1341	0.660144	0.877919	0.0721462	0.450956
yjm1342	0	0	0.00123063	0
yjm1355	0	0	0.00122542	0
yjm1356	0.0156931	0.304514	0.000575899	0.000475535
yjm1381	1.04687	1.31637	0.969733	1.78287
yjm1383	0	0.118315	Inf	NA
yjm1385	0.0106784	0.226196	0.0159032	0.000312914
yjm1386	0.991549	1.34216	0.378187	0.737224
yjm1387	0.0507442	0.573775	0.00628875	0.00361337
yjm1389	1.18945	1.38318	1.13414	1.61642
yjm1399	0.000529657	0.0277921	0.0302168	0
yjm1400	0.100598	0.275105	0.0342673	0.147238
yjm1401	0.906389	1.05234	0.169161	0.290561
yjm1402	0.0769358	0.435711	0.0224284	0.152195
yjm1415	0.541632	0.772496	0.259246	0.562937
yjm1417	0.325303	0.721268	0.356089	0.386684
yjm1418	1.27422	1.36374	1.09018	1.51455
yjm1434	0.120034	0.572869	0.428449	0.62772
yjm1439	0.970833	1.18496	0.000947723	0.815719
yjm1443	0.939563	1.05668	0.484421	0.619714
yjm1444	0.0257138	0.448477	0.000455148	0.00362499
yjm1447	1.31396	1.47957	1.02251	1.57705
yjm1450	1.25836	1.31521	0.774309	0.977688
yjm1460	0.90782	1.00343	0.743056	0.907947
yjm1463	0.123486	0.711384	0.108613	0.0251307
yjm1477	0.0582041	0.539065	0.0161599	0.205202
yjm1478	0.00099635	0.129182	0.0346682	0.0263241
yjm1479	0	0	0.00172012	0
yjm1526	0.648134	0.930326	0.533125	0.880893
yjm1527	0.32806	0.692656	0.00166755	0.00193556
yjm1549	1.17775	1.27864	0.788214	1.19785
yjm1573	0.00892758	0.418013	0.0392208	0.0306819
yjm1574	1.22217	1.45103	0.976161	1.21069
yjm1592	1.12453	1.26726	1.05048	1.4657
yjm1628	0	0.00156483	0.00116004	0
yjm1846	1.16093	1.42389	1.14487	1.70632
yjm1847	1.21388	1.36952	1.08387	2.70044
yJM1869	0.113685	0.622732	0.00066612	0
yjm1870	0.796833	0.983797	0.0221393	0.0173776

## Sheet: mito DNA damage
Strains	Ethidium bromide-0.6mg/L, SE, 72h	Ethidium bromide-0.6mg/L, SE, 96h	Ethidium bromide-1.2mg/L, SE, 48h	Ethidium bromide-1.5mg/L, SE, 24h	Ethidium bromide-1.5mg/L, SE, 48h	Ethidium bromide-1.2mg/L YPE	Methotrexate-5mg/L, SE, 96h
s288c	0.900781	0.928846	0.695988	0.948453	1.34042	0.97426	0.49137
sk1	0.10539	0.276552	0.013144	0.000144425	0	0	0.321806
rm11-1a	1.09893	1.10905	0.948875	0.976635	1.45195	1.02142	0.325163
sigma1278b	1.03787	1.04444	0.891848	0.933199	1.2453	0.991433	0.827167
yps163	1.00875	0.995135	0.962629	0.95712	1.34705	1.06506	0.777532
yjm789	1.01153	1.01119	0.850097	0.964365	1.26684	0.956749	0.330176
m22	0.962297	1.04381	0.966211	0.969202	1.25144	0.851281	0.140849
yjm189	1.13218	1.11995	0.924337	0.92033	1.47072	1.14445	0.157325
yjm193	1.00842	1.01217	1.00989	1.01746	1.36861	1.06728	0.588326
yjm195	1.03485	1.04154	1.00054	0.972309	1.31312	1.11499	0.572381
yjm244	0.933492	0.877249	0.382847	0.894168	1.33484	1.02442	0.823952
yjm248	0.747413	0.740973	0.216806	0.866294	1.06954	0.778549	0.62133
yjm270	1.28793	1.22767	0.647434	0.910959	1.55053	0.986117	0.304187
yjm271	0.371303	0.622866	0.0432091	0.887093	1.33211	0.956734	0.716192
yjm320	0.988913	0.978685	0.957005	0.924057	1.26825	1.04507	0.383035
yjm326	1.0054	1.00678	0.926354	0.924082	1.25293	0.969309	0.430479
yjm428	1.06418	1.07087	0.864989	0.966254	1.22251	1.00203	0.508721
yjm450	1.08201	1.13558	0.943717	0.584869	1.8052	1.04075	0.317966
yjm451	1.04135	1.05392	0.995771	1.00568	1.36779	1.06307	0.318008
yjm453	0.961993	0.966001	0.807417	0.940035	1.20582	0.932329	1.05259
yjm456	1.05014	1.05947	0.993383	1.00571	1.30664	1.0815	0.775069
yjm470	1.28542	1.64176	2.29818	1.59804	10.5657	0.95136	1.68414
yjm541	0.956943	0.963792	0.987471	0.939682	1.25786	0.942851	0.176953
yjm554	0.963133	0.950046	0.640085	0.933617	1.34669	1.04054	0.244975
yjm555	1.02528	1.03247	0.991378	0.973371	1.28269	1.01334	0.219331
yjm627	0.250012	0.433253	0.0143766	0	0	0	0.504026
yjm681	1.02482	1.03921	1.01636	1.02021	1.40248	1.08817	0.587622
yjm682	1.01715	1.01398	0.9285	0.976751	1.19451	0.966966	0.82673
yjm683	1.03265	1.10378	0.701101	0.98055	1.36847	0.956923	0.51168
yjm689	0.977526	0.974298	0.905224	0.765052	1.30532	1.03385	0.169411
yjm693	1.03661	1.02797	0.891629	0.907089	1.20327	0.869193	0.527202
yjm969	0.940831	0.940177	0.805646	0.975318	1.42888	1.08371	1.02273
yjm972	0.928526	0.927459	0.516307	0.916364	1.28792	1.06853	1.02117
yjm975	0.994068	0.976102	0.545882	0.967843	1.50932	1.06816	0.893979
yjm978	0.973011	0.940595	0.587691	0.960494	1.4091	1.01194	1.07554
yjm981	1.06485	1.00944	0.692441	0.97203	1.4374	1.02386	1.02537
yjm984	0.878149	0.87908	0.528131	0.952763	1.33342	1.02419	1.0106
yjm987	0.711082	0.768606	0.45429	0.999337	1.27328	1.08793	0.944852
yjm990	0.816164	0.947663	0.489573	1.014	1.50329	1.11064	0.865315
yjm993	0.853121	0.855441	0.440827	0.937852	1.31287	1.00999	0.960299
yjm996	0.978314	0.963426	0.421013	0.922433	1.35245	1.02728	0.931074
yjm1078	1.03623	1.00855	0.969059	0.96497	1.26861	0.980153	0.431599
yjm1083	0.936408	0.953642	0.895233	0.300572	1.40628	0.91345	0.874534
yjm1129	0.657389	0.718186	0.397338	0.923574	1.26423	0.989374	0.224582
yjm1133	1.06332	1.08209	0.969983	1.02067	1.32391	1.06962	0.27257
yjm1190	1.07829	1.06199	0.940372	0.79339	1.43538	0.91961	0.83251
yjm1199	0.930284	0.976379	0.302231	0.733357	1.98991	1.02492	0.017648
yjm1202	0.981949	0.958643	0.768135	0.844397	1.19629	0.891245	0.264229
yjm1208	0.889001	0.890246	0.719701	0.940602	1.21883	0.974118	0.740387
yjm1242	0	0.2026	0.0147113	0	0	0.178742	0
yjm1244	0.446809	0.579186	0.140747	1.00505	1.96478	1.19991	0.309737
yjm1248	0.776012	0.835765	0.262195	0.463661	0.615862	0.300819	0.650996
yjm1252	1.13603	1.16626	1.00427	1.00194	1.25576	1.04882	0.754793
yjm1273	1.1068	1.11983	0.986089	1.01402	1.38938	1.12677	0.737897
yjm1304	0.957185	0.95515	0.687967	0.908984	1.27608	0.907786	0.272566
yjm1307	0.897419	0.947273	0.845752	0.90442	1.43635	1.03734	0.258989
yjm1311	1.05052	1.05104	0.864651	0.858784	1.08047	0.949467	0.605499
yjm1326	0.828947	0.841802	0.62807	0.944736	1.29905	0.992115	0.286966
yjm1332	0.930451	0.929153	0.503879	0.925212	1.29252	0.974759	0.345473
yjm1336	0.814132	0.828518	0.830157	1.0184	1.41136	0.963127	0.22582
yjm1338	0.983759	0.992857	1.00016	1.01465	1.42611	1.054	0.573268
yjm1341	0.864177	0.897255	0.303708	0.896283	1.38918	0.750854	1.02376
yjm1342	0.872925	0.901559	0.635189	0.883449	1.1288	0.971199	0.701142
yjm1355	0.0937958	0.258301	0.0539802	0.700194	1.01161	0.764599	0.0161799
yjm1356	0.922316	0.900389	0.0444944	0.57089	1.01226	0.878265	0.94619
yjm1381	0.45775	0.443117	0.59559	0.981241	1.78202	0.989919	1.11958
yjm1383	0.0337593	0.269588	0.0480508	NA	NA	0.0264668	1.18139
yjm1385	0.978141	0.9751	0.64634	0.601213	1.28757	0.982378	1.0984
yjm1386	1.0434	1.03951	0.410204	0.880236	1.24723	0.943045	0.474012
yjm1387	0.957585	0.995519	0.147795	0.55957	2.2597	0.96627	0.015634
yjm1389	1.04142	1.01865	1.06898	0.8767	1.07724	0.919168	0.483746
yjm1399	1.07654	1.13214	1.02908	1.0246	1.29926	1.063	0.833784
yjm1400	0.672437	0.70189	0.56337	0.937384	1.23906	0.894652	0.437914
yjm1401	0.93611	0.915049	0.998144	0.878177	1.49189	0.996002	0.932137
yjm1402	1.02444	1.04737	0.980739	1.02287	1.45381	1.07118	0.793747
yjm1415	0.153923	0.165713	0.256018	0.877147	1.09547	0.791076	0.176418
yjm1417	1.00528	0.988097	0.628769	0.947912	1.35039	1.01607	0.354234
yjm1418	1.00792	1.00889	1.00389	1.02272	1.39095	1.0728	0.658449
yjm1434	0.969524	0.983133	0.964768	1.0481	1.45043	1.09243	0.786745
yjm1439	0.00254532	0.0595778	0	0.00269496	0	0	0.770818
yjm1443	0.967594	0.939382	1.02874	0.961413	1.32343	1.02751	1.0761
yjm1444	0.497941	0.686652	0.78326	0.267353	0.979321	0.8386	0.4617
yjm1447	1.05315	1.02851	0.958034	0.949336	1.35932	1.02032	0.497613
yjm1450	1.03388	1.01249	1.00357	0.943894	1.36275	1.12416	0.998215
yjm1460	0.993539	0.985485	0.803102	0.808615	0.959005	0.739684	0.619655
yjm1463	1.01162	0.997779	1.00545	1.02183	1.4942	1.06183	0.534722
yjm1477	0.956574	0.933257	0.776217	0.938333	1.3368	1.04555	0.310472
yjm1478	0.826444	0.887847	0.504667	0.985096	1.34143	0.984764	0.983493
yjm1479	0.113434	0.189836	0.369508	0.845602	1.06213	0.788148	0.603768
yjm1526	0.876505	0.948744	0.501137	0.98784	1.43567	1.02679	0.121127
yjm1527	1.08231	1.12175	0.993687	1.02095	1.4603	1.07348	0.792395
yjm1549	0.782748	0.833055	0.619039	1.01629	1.40566	1.12873	0.718628
yjm1573	1.04816	1.03518	0.957376	0.984764	1.4051	1.03982	0.734281
yjm1574	1.07147	1.10985	0.962466	1.03686	1.3193	1.06281	0.860247
yjm1592	1.00777	1.03844	1.11158	1.03379	1.3685	1.05575	0.369664
yjm1628	0.971793	0.961604	0.868862	0.918233	1.25336	1.02843	0.324596
yjm1846	0.928805	0.986491	0.378647	1.01305	1.44711	0.991488	0.15833
yjm1847	1.01094	1.0164	0.88965	0.154068	2.25165	1.02161	0.473261
yJM1869	0.505572	0.603602	0.373691	0.995107	1.28349	1.04448	0.161125
yjm1870	0.0414972	0.0788112	0.111871	0.147604	0.32018	0.0072903

## Sheet: 5-fluoro-pyrimidines
Strains	5-fluorouracil-1mg/L, SE, 96h	5-Fluorocytosine-0.2mg/L, SE, 96h
s288c	0.33104	0.319798
sk1	0.314304	0.245805
rm11-1a	0.366551	0.715531
sigma1278b	0.392701	0.935717
yps163	0.591318	0.720506
yjm789	0.642088	0.856121
m22	0.33417	0.861572
yjm189	0.0629456	0.12594
yjm193	0.779732	1.03508
yjm195	0.600446	0.882634
yjm244	0.533704	0.675691
yjm248	0.470428	0.761027
yjm270	0.829966	0.879217
yjm271	0.0111115	0.337593
yjm320	0.788636	0.926242
yjm326	0.453464	0.791852
yjm428	0.422412	0.559622
yjm450	0.608067	0.762035
yjm451	0.834498	0.832809
yjm453	0.881499	1.01498
yjm456	0.640306	0.871583
yjm470	0.0278066	0.234863
yjm541	0.656022	0.829655
yjm554	0.432769	0.565584
yjm555	0.588915	0.829857
yjm627	0.676466	0.894919
yjm681	0.590245	0.958509
yjm682	0.430986	0.570434
yjm683	0.504315	0.806503
yjm689	0.0164983	0.0340754
yjm693	0.503101	0.704394
yjm969	0.665616	0.906966
yjm972	0.577973	0.905119
yjm975	0.52	0.664854
yjm978	0.470536	0.708873
yjm981	0.499925	0.645062
yjm984	0.538902	0.764725
yjm987	0.407287	0.765257
yjm990	0.352456	0.618687
yjm993	0.565636	0.685711
yjm996	0.431013	0.645554
yjm1078	0.546794	0.640887
yjm1083	0.925098	1.07529
yjm1129	0.672488	0.976788
yjm1133	0.74924	0.858899
yjm1190	0.550206	0.566755
yjm1199	0.380247	0.323695
yjm1202	0.448625	0.556904
yjm1208	0.696014	0.828987
yjm1242	0	0
yjm1244	0.206657	0.294472
yjm1248	0.356944	0.742868
yjm1252	0.808273	0.966038
yjm1273	0.562937	0.667186
yjm1304	0.465641	0.629796
yjm1307	0.658937	0.724904
yjm1311	0.560958	0.658457
yjm1326	0.62841	0.769053
yjm1332	0.244236	0.519498
yjm1336	0.489819	0.657592
yjm1338	0.585033	0.786071
yjm1341	0.727122	0.914689
yjm1342	0.864163	0.924362
yjm1355	0.118631	0.204668
yjm1356	0.0296587	0.423255
yjm1381	0.499576	0.876414
yjm1383	0.874364	0.476934
yjm1385	0.407341	0.763367
yjm1386	0.481113	0.687478
yjm1387	1.03089	0.990136
yjm1389	1.24025	0.654724
yjm1399	0.914129	1.07759
yjm1400	0.400953	0.458931
yjm1401	0.681081	0.848573
yjm1402	0.781552	0.970519
yjm1415	0.481342	0.655659
yjm1417	0.480422	0.82086
yjm1418	0.682252	0.832848
yjm1434	0.583602	0.771642
yjm1439	0.0806053	0.487642
yjm1443	1.07975	1.16875
yjm1444	0.0256761	0.00687208
yjm1447	0.780139	0.964898
yjm1450	0.913195	1.00545
yjm1460	0.501926	0.717558
yjm1463	1.06757	1.03397
yjm1477	0.41764	0.548198
yjm1478	0.562312	0.583339
yjm1479	0.432664	0.436631
yjm1526	0.340331	0.753269
yjm1527	0.603922	0.726132
yjm1549	0.635991	0.837631
yjm1573	0.719176	0.851444
yjm1574	0.247142	0.665014
yjm1592	1.10633	0.833603
yjm1628	0.362062	0.550605
yjm1846	0.28327	0.169783
yjm1847	0.225649	0.478222
yJM1869	0.600163	0.95287
yjm1870	0.176859	0.449512
